# Supplementary material for: High-yield, one-pot upcycling of polyethylene and polypropylene waste into blue-emissive carbon dots
Source: Royal Society of Chemistry journal article supplement (doi:10.1039/d2gc04177d), 2023-01-01
Supplement: d2gc04177d2.pdf [file d2gc04177d2.pdf]

# Supplemental Figure 1

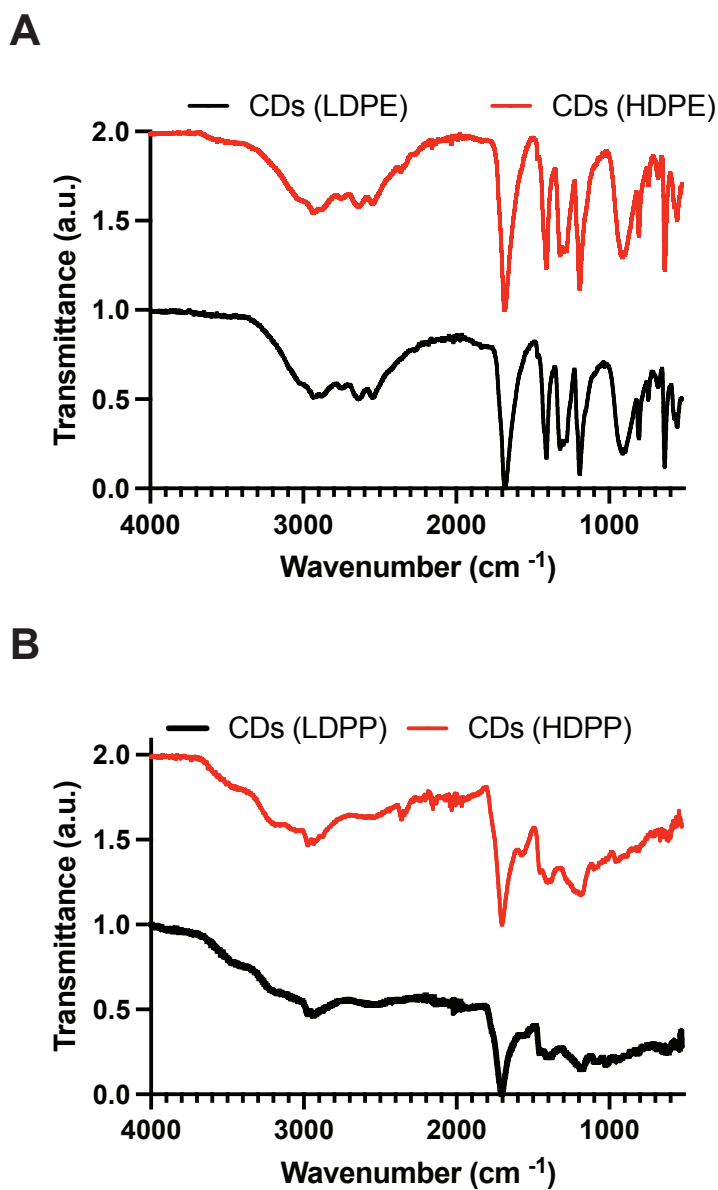

**Figure S1.** FTIR spectra for (A) LDPE- and HDPE-derived CDs and (B) LDPP- and HDPP-derived CDs.

# Supplemental Figure 2

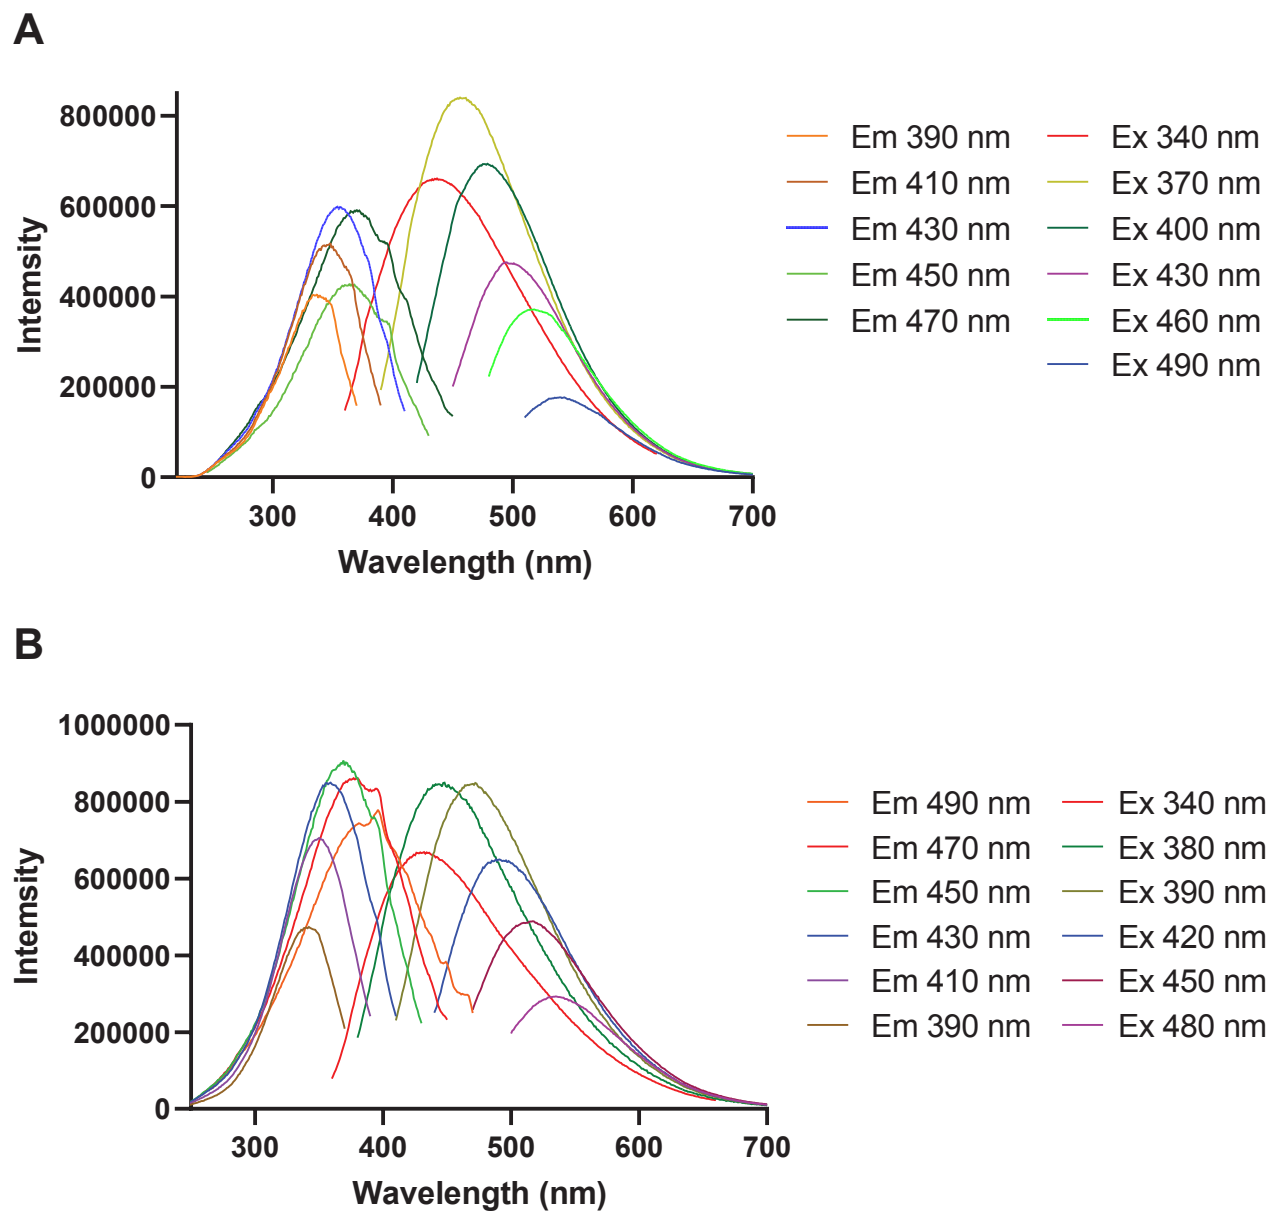

## Supplemental Figure 3

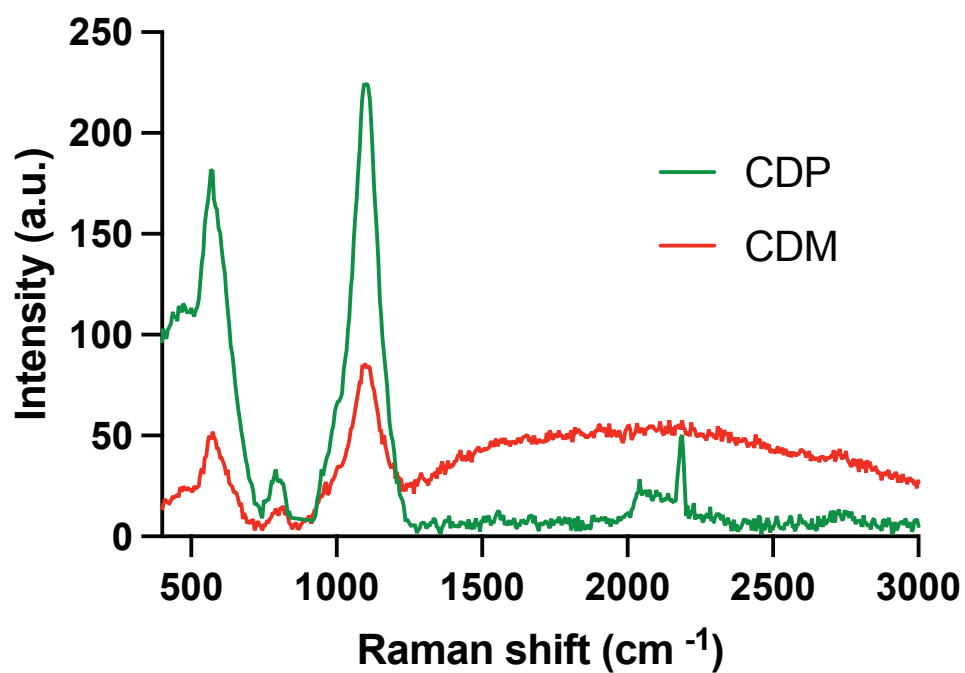

**Figure S3.** Raman spectra for mask-derived CDs (CDM) and bag-derived CDs (CDP).

# Supplemental Figure 4

**A**

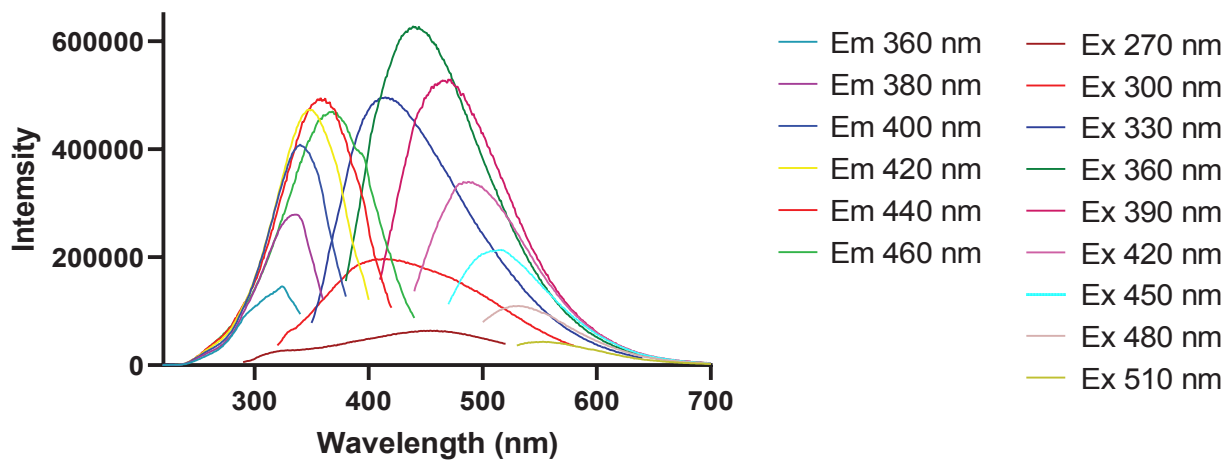

**B**

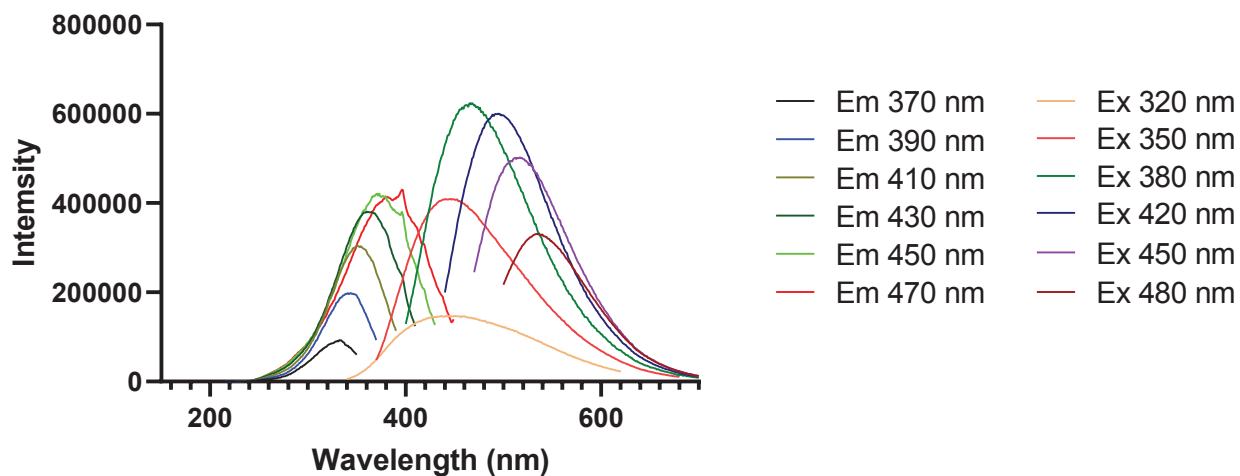

**Figure S4.** Emission-dependent excitation and excitation-dependent emission of (A) CDPC and (B) CDMC.



# Supplemental Figure 5

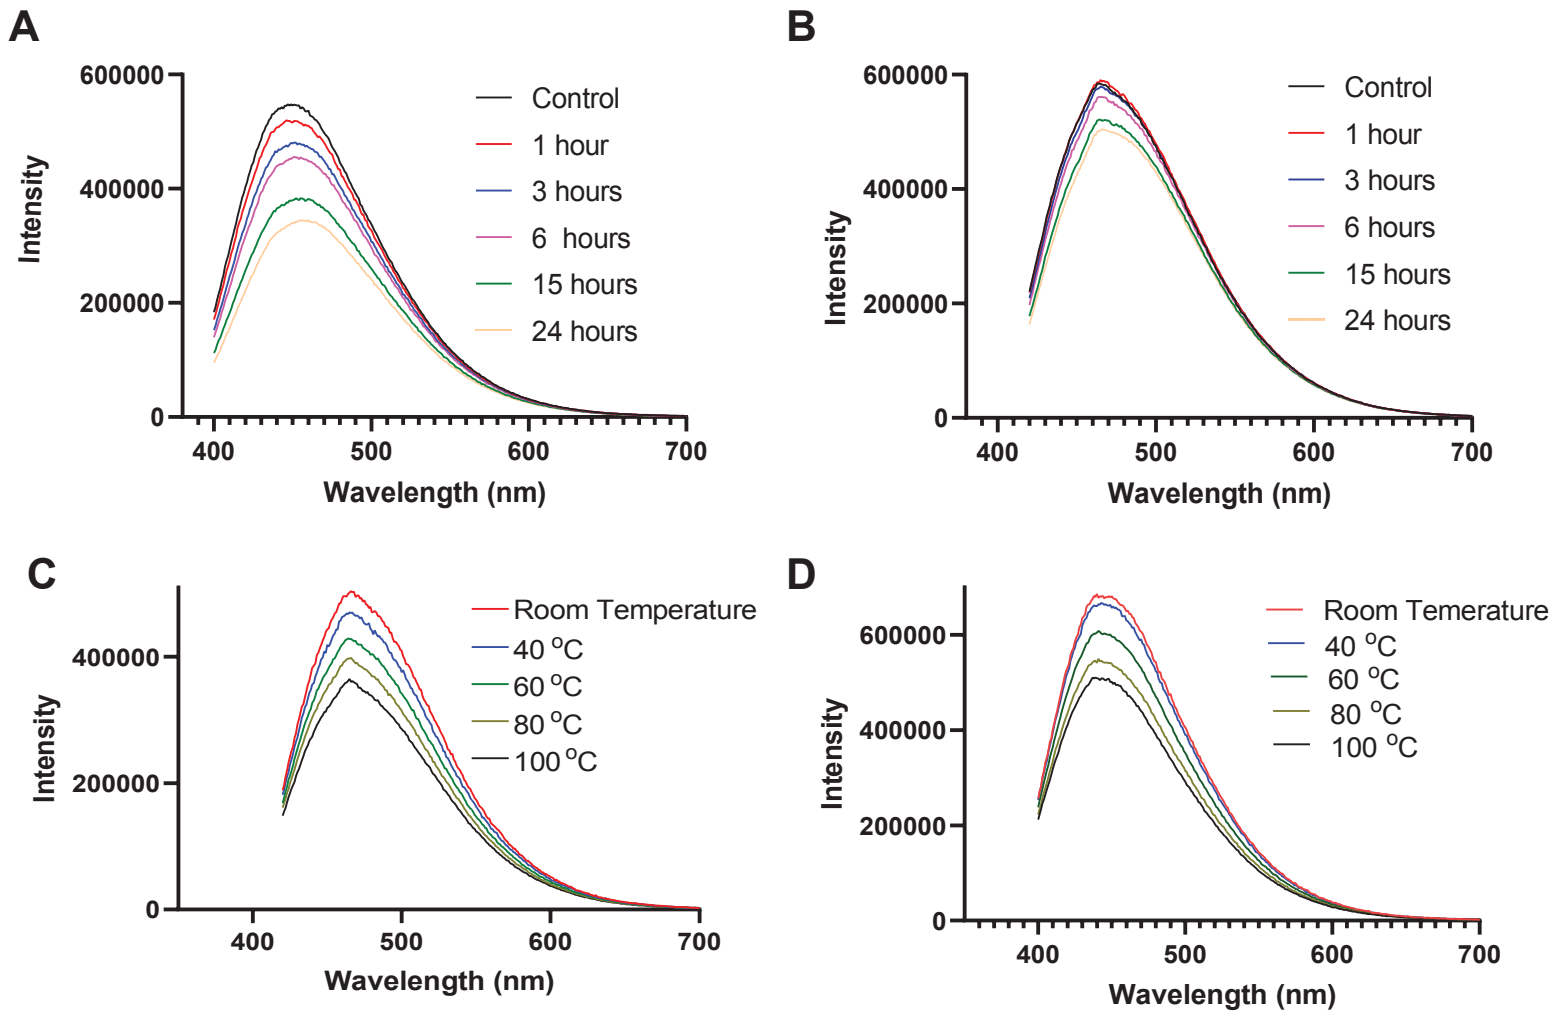

**Figure S5.** (A,B) Photostability test of (A) CDM and (B) CDP under continuous UV irradiation. (C,D) Thermal stability of (C) CDM and (D) CDP at different temperatures.

# Supplemental Figure 6

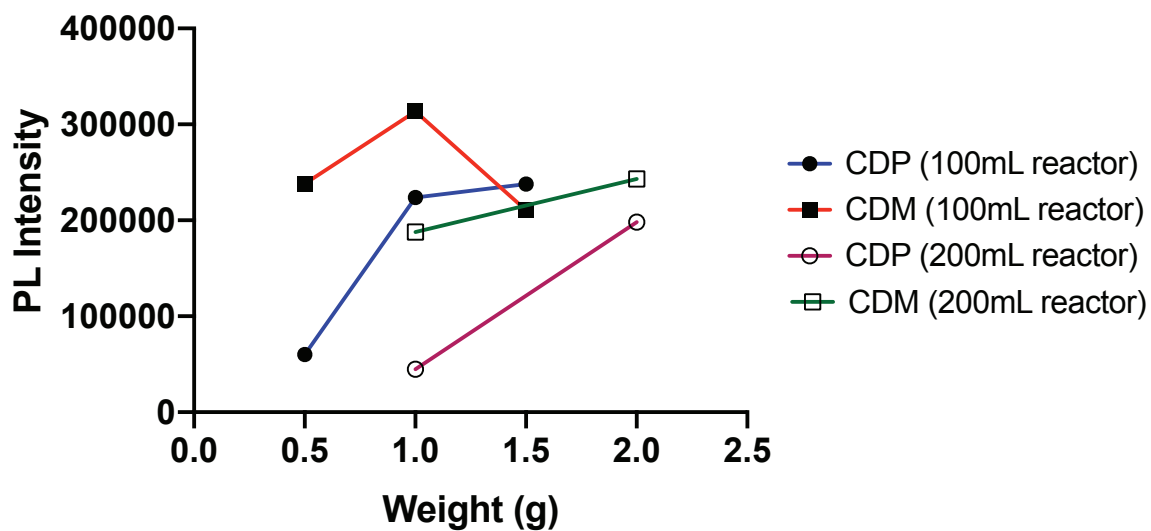

**Figure S6.** Photoluminescence intensity of CDP and CDM at different weights of plastic and mask loads using small (100 ml) and large (200 ml) autoclave reactors.

# Supplemental Figure 7

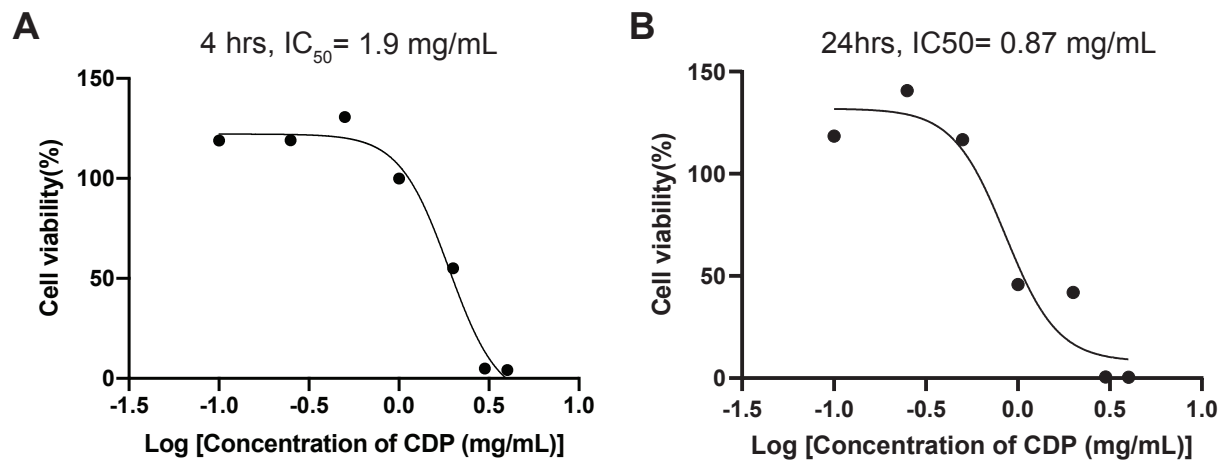

**Figure S7.** MTT assay results on the viability of HeLa cells after exposure to different concentrations (0.1, 0.25, 0.5, 1, and 2 mg/ml) of CDP after (A) 4 and (B) 24 hours of incubation.

# Supplemental Figure 8

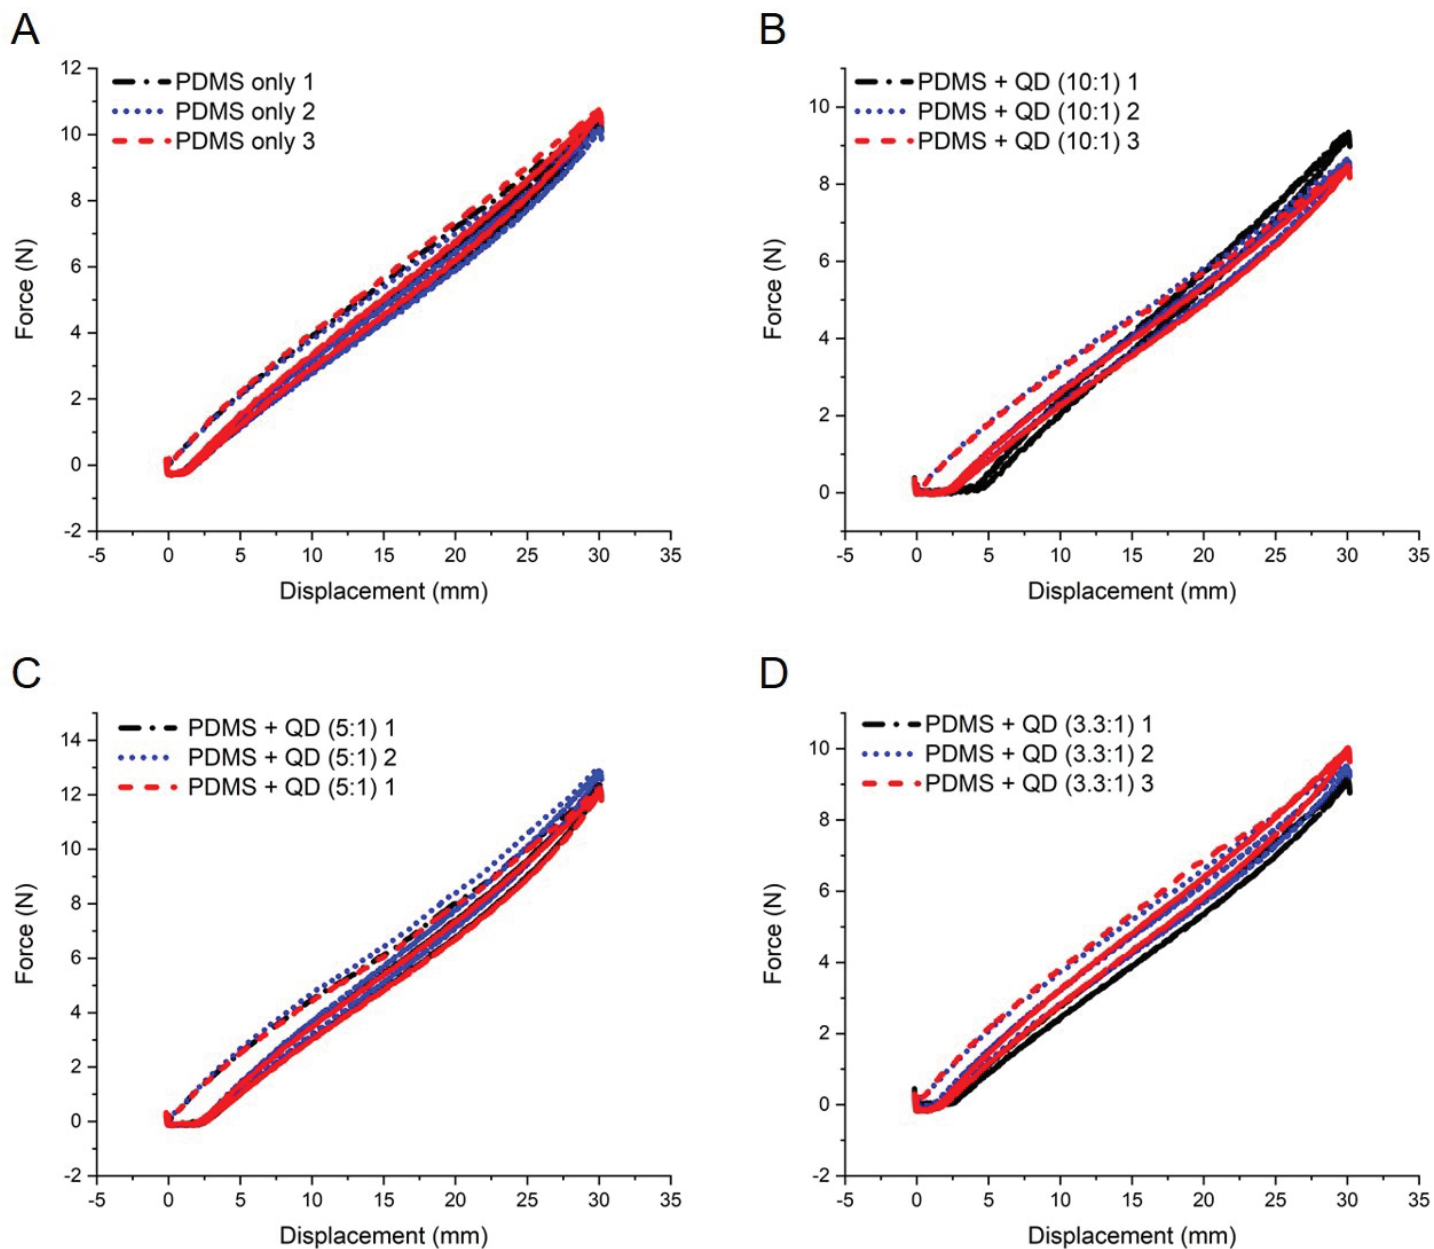

**Figure S8.** Cyclical deformation response of the QD doped PDMS. (A) Cyclical force-displacement response for the PDMS only control samples. (B) Cyclical force-displacement response for the PDMS + QD (10:1) samples. (C) Cyclical force-displacement response for the PDMS + QD (5:1) samples. (D) Cyclical force-displacement response for the PDMS + QD (3.3:1) samples.
